# Supplementary material for: Graphene oxide links alterations of anti-viral signaling pathways with lipid metabolism via suppressing TLR3 in vascular smooth muscle cells
Source: Royal Society of Chemistry journal article supplement (doi:10.1039/d2mo00086e), 2022-08-01
Supplement: d2mo00086e1.pdf [file d2mo00086e1.pdf]

Supporting information

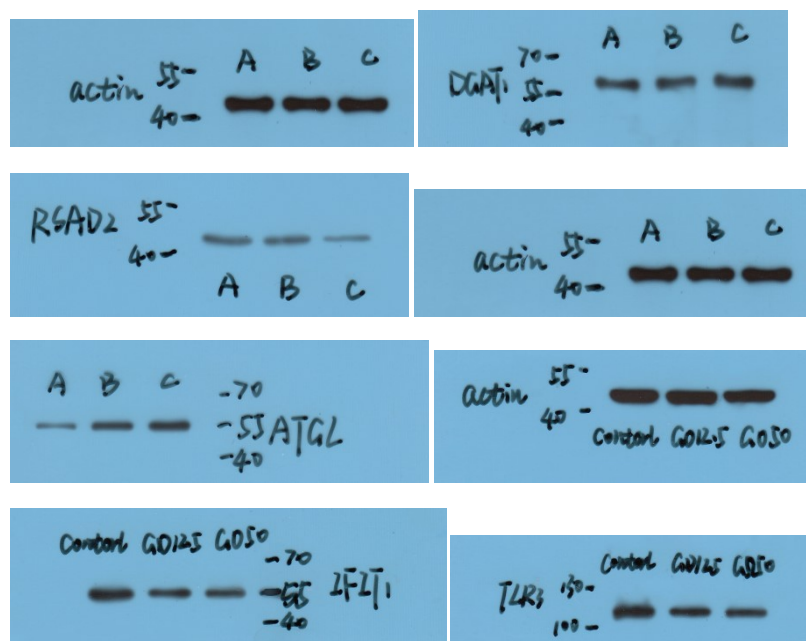

Figure S1. The unedited Western blot images for *in vitro* studies.

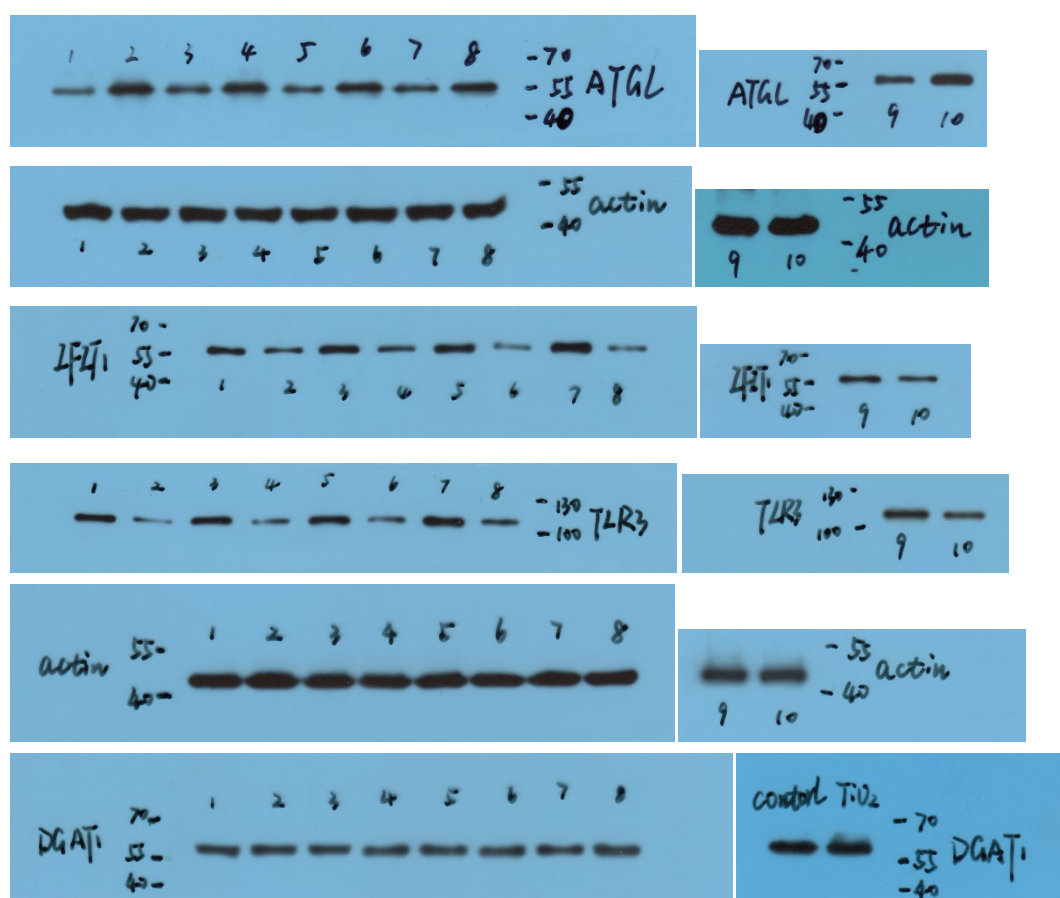

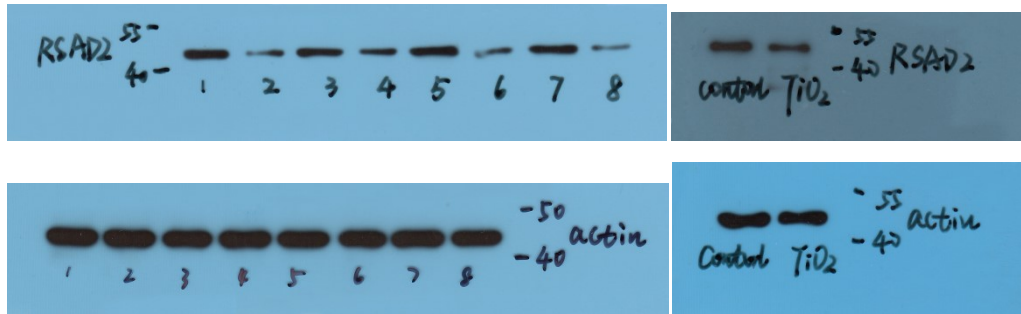

Figure S2. The unedited Western blot images for *in vivo* studies.

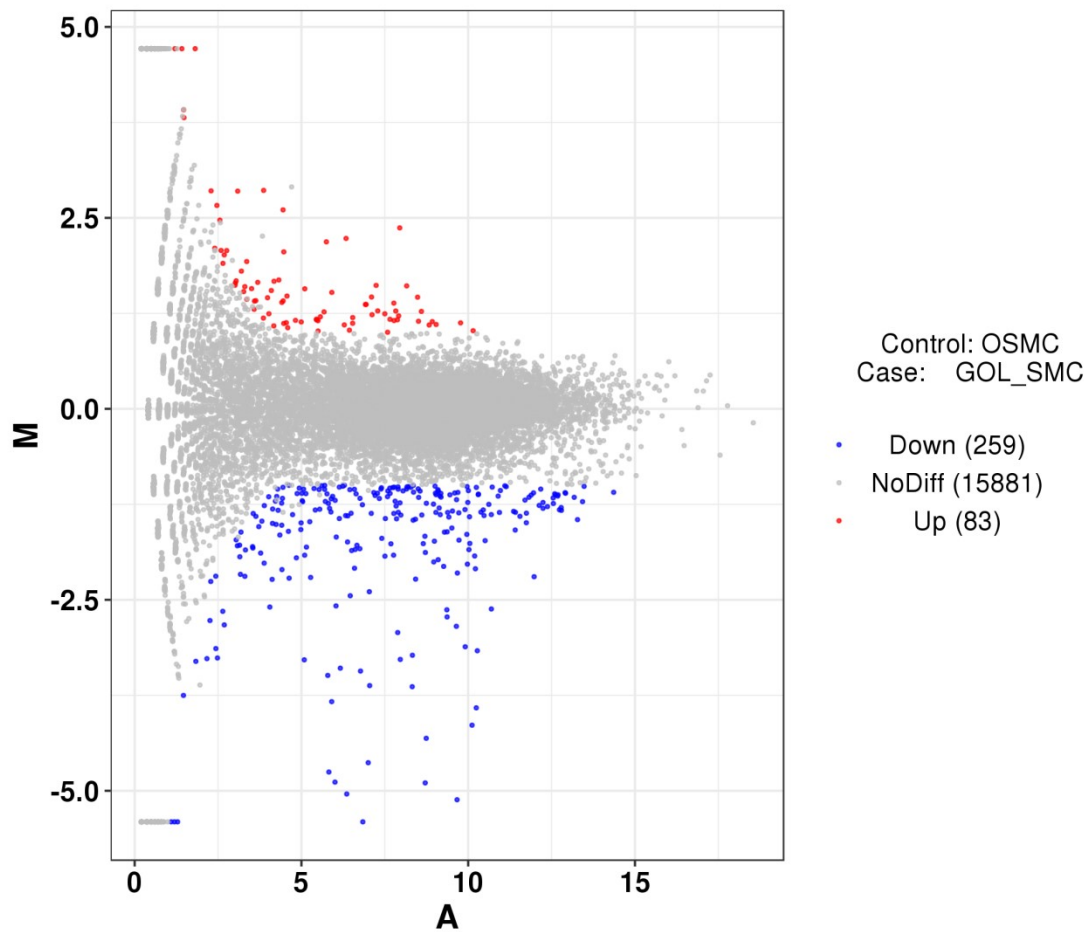

Figure S3. The MA plot showing the statistical changes of genes. Human VSMCs were exposed to 12.5  $\mu\text{g}/\text{mL}$  graphene oxide for 24 h before RNA-sequencing experiment.

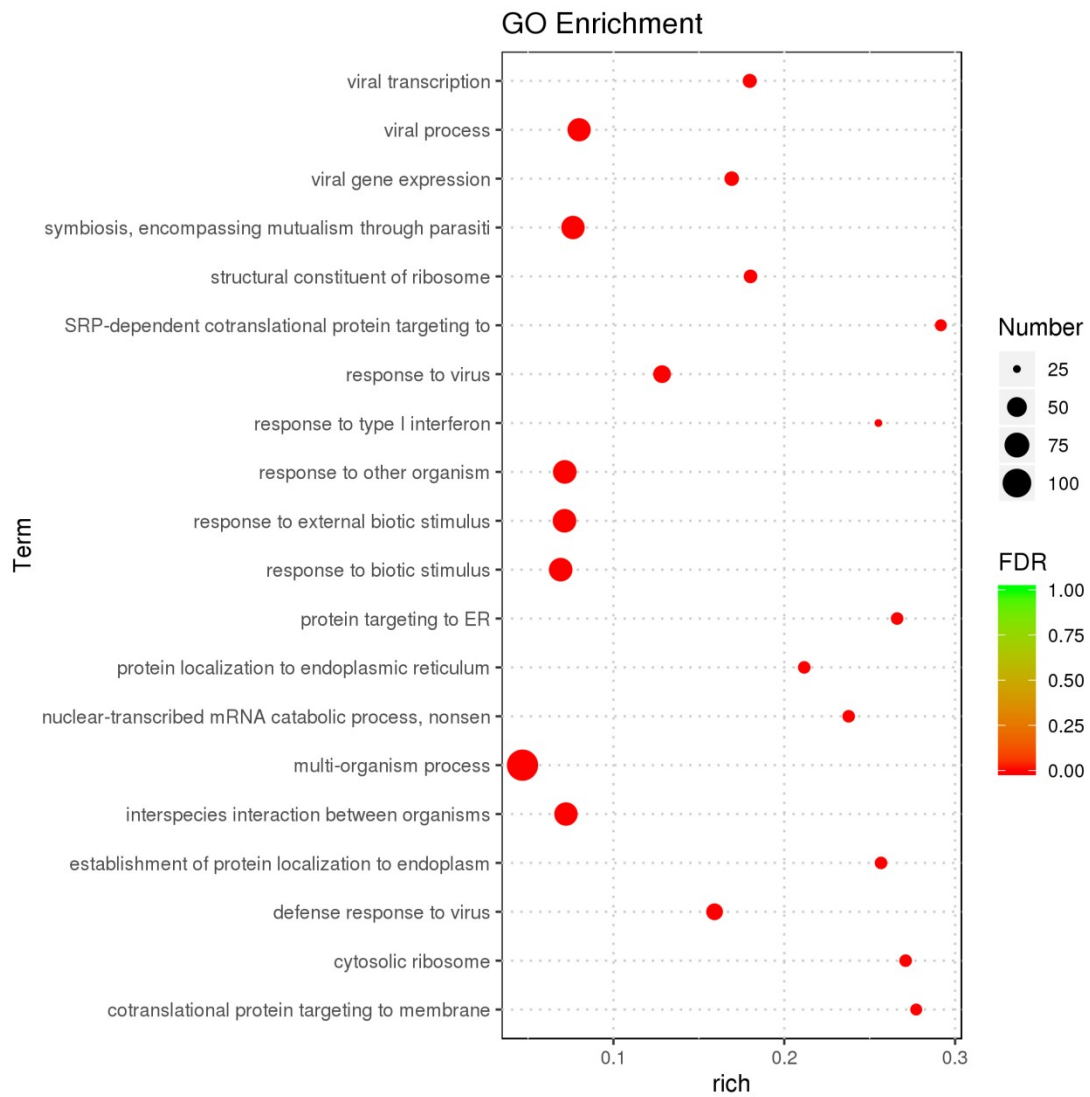

Figure S4. The most significantly changed GO terms. Human VSMCs were exposed to 12.5  $\mu\text{g}/\text{mL}$  graphene oxide for 24 h before RNA-sequencing experiment.

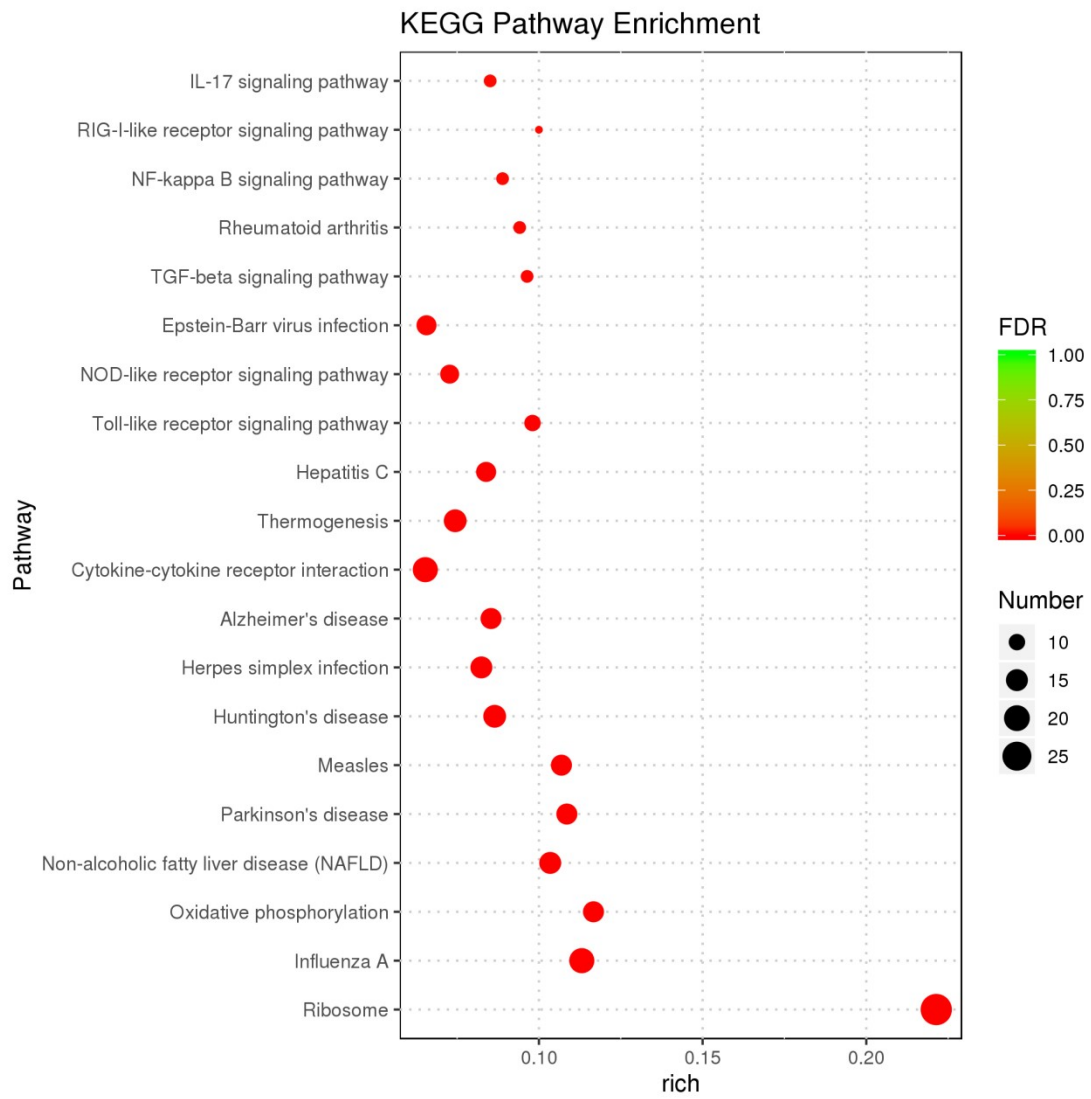

Figure S5. The most significantly changed KEGG pathways. Human VSMCs were exposed to 12.5  $\mu\text{g}/\text{mL}$  graphene oxide for 24 h before RNA-sequencing experiment.

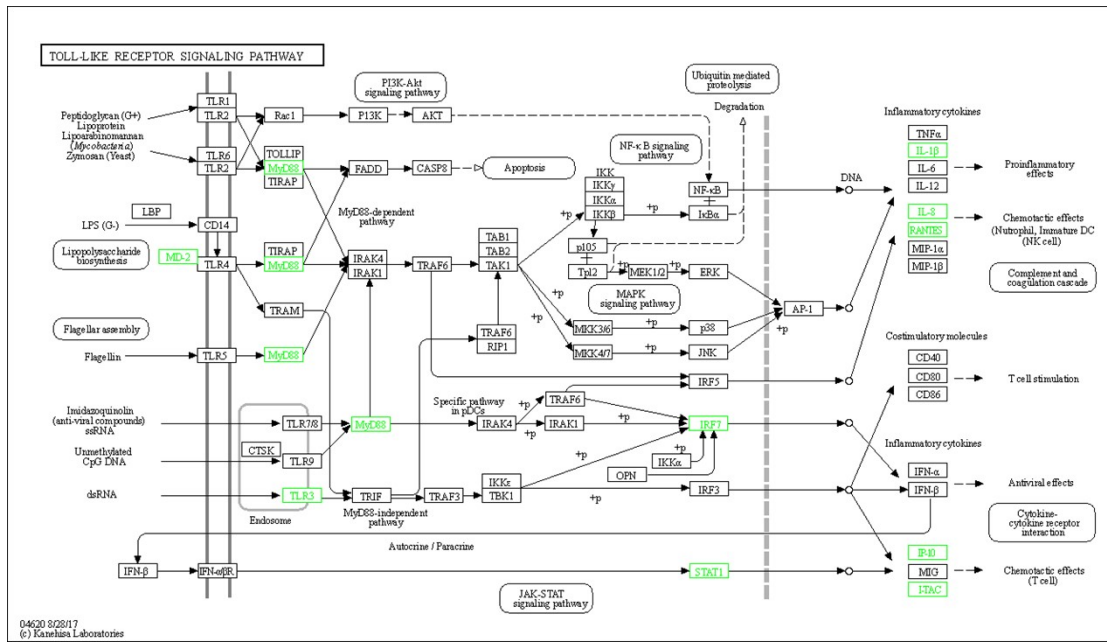

Figure S6. Toll-like receptor signaling pathway (hsa04620) in human VSMCs exposed to 12.5  $\mu\text{g}/\text{mL}$  graphene oxide for 24 h. The green color indicated the significantly down-regulated genes.

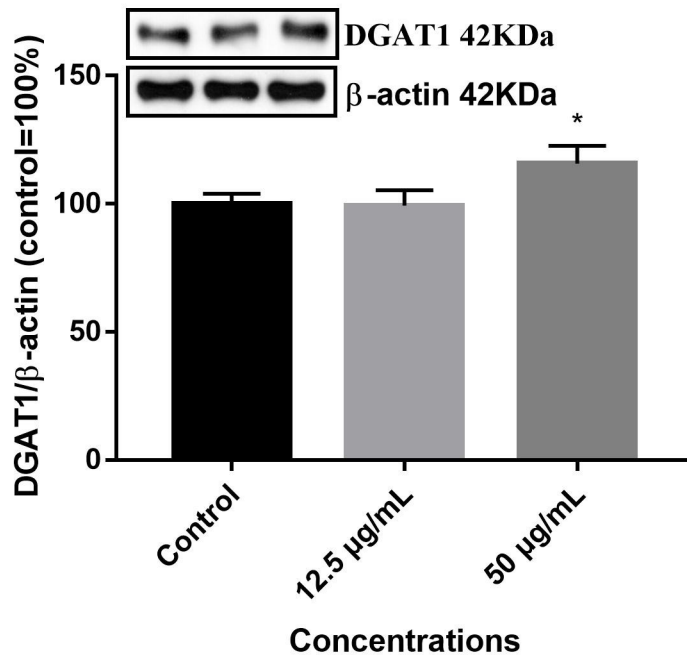

Figure S7. The changes of DGAT1 in human VSMCs after 24 h exposure to 12.5 or 50  $\mu\text{g}/\text{mL}$  graphene oxide. \*,  $p < 0.05$ , compared with control.

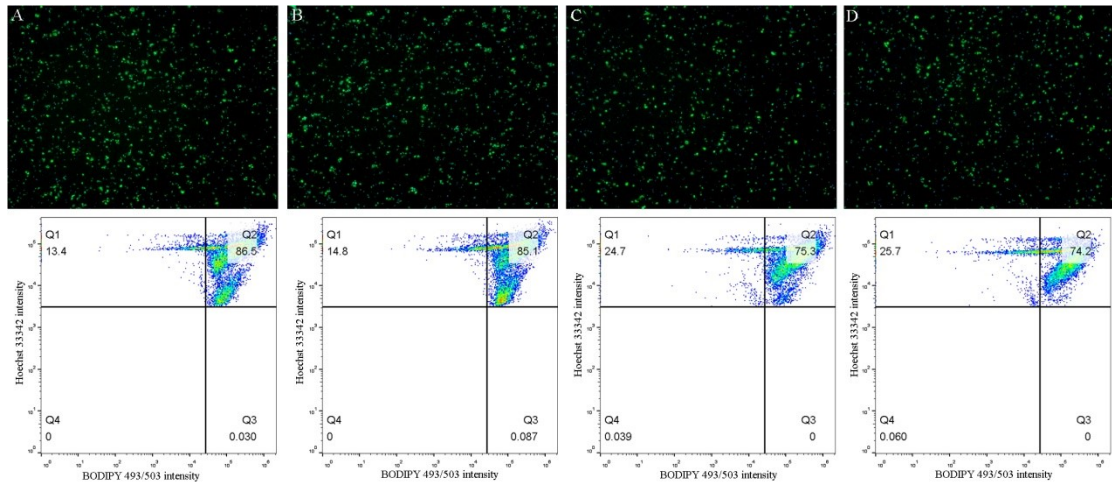

Figure S8. The changes of BODIPY493/503 staining. Human VSMCs were incubated with cell culture medium (control; S6A), 100  $\mu\text{g}/\text{mL}$  Poly IC (S6B), 12.5  $\mu\text{g}/\text{mL}$  graphene oxide (S6C), or graphene oxide plus Poly IC (S6D) for 24 h, and then counterstained by Hoechst 33342 (blue fluorescence) and BODIPY 493/503 (green fluorescence). The cells were imaged (upper panels) and the intensity of BODIPY 493/503 was analyzed (lower panels).

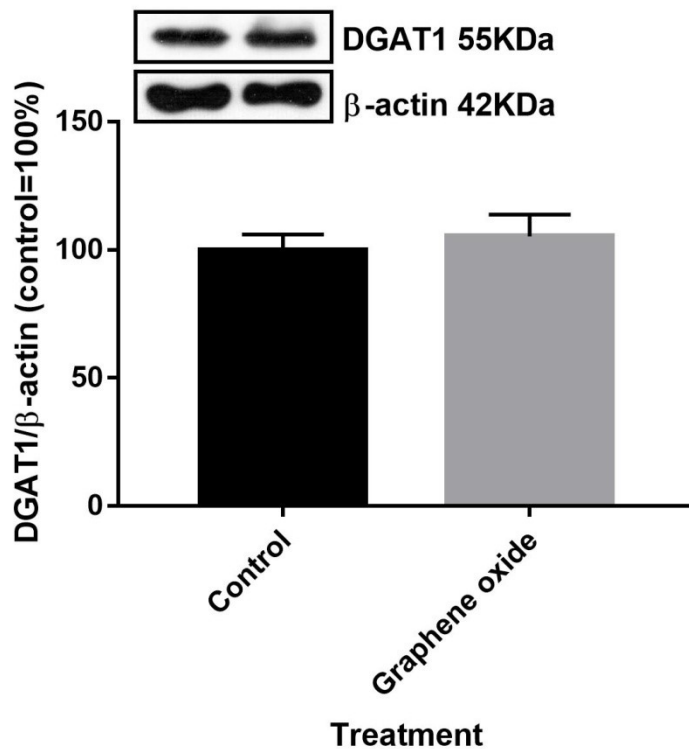

Figure S9. The changes of DGAT1 in mouse aortas. The mice were intravenously administrated with 20  $\mu\text{g}$  graphene oxide per day, totally 5 days before Western blotting experiment.

Table S1. The complete list of TLR3-related GO terms in human VSMCs exposed to 12.5 µg/mL graphene oxide for 24 h. These GO terms were categorized according to biological process (BP), cellular component (CC) and molecular function (MF), respectively.

| Category | GO.ID      | Term                                                           | Up | Down | DEG | Total | P value | FDR      |
|----------|------------|----------------------------------------------------------------|----|------|-----|-------|---------|----------|
| BP       | GO:0051607 | defense response to virus                                      | 1  | 38   | 39  | 245   | 2.3E-25 | 2.74E-22 |
| BP       | GO:0009615 | response to virus                                              | 1  | 41   | 42  | 327   | 1.7E-23 | 9.77E-21 |
| BP       | GO:0006952 | defense response                                               | 7  | 74   | 81  | 1610  | 2E-17   | 3.83E-15 |
| BP       | GO:0045087 | innate immune response                                         | 3  | 54   | 57  | 912   | 2.9E-16 | 4.82E-14 |
| BP       | GO:0002376 | immune system process                                          | 14 | 89   | 103 | 2914  | 6.5E-12 | 6.96E-10 |
| MF       | GO:0003723 | RNA binding                                                    | 4  | 65   | 69  | 1674  | 3.5E-11 | 3.57E-09 |
| BP       | GO:0071346 | cellular response to interferon-gamma                          | 0  | 18   | 18  | 177   | 4.8E-09 | 4.10E-07 |
| MF       | GO:0003725 | double-stranded RNA binding                                    | 0  | 10   | 10  | 74    | 7.9E-07 | 4.71E-05 |
| CC       | GO:0005737 | cytoplasm                                                      | 55 | 194  | 249 | 11583 | 1.1E-06 | 6.15E-05 |
| BP       | GO:0001819 | positive regulation of cytokine production                     | 2  | 22   | 24  | 461   | 5.1E-06 | 2.27E-04 |
| CC       | GO:0005615 | extracellular space                                            | 23 | 63   | 86  | 3145  | 2.7E-05 | 9.98E-04 |
| BP       | GO:0032755 | positive regulation of interleukin-6 production                | 1  | 8    | 9   | 96    | 6.9E-05 | 2.31E-03 |
| BP       | GO:0032481 | positive regulation of type I interferon production            | 0  | 8    | 8   | 79    | 1.0E-04 | 3.16E-03 |
| BP       | GO:0051092 | positive regulation of NF-kappaB transcription factor activity | 1  | 10   | 11  | 150   | 1.1E-04 | 3.34E-03 |
| BP       | GO:0009597 | detection of virus                                             | 0  | 3    | 3   | 6     | 1.2E-04 | 3.55E-03 |
| BP       | GO:0007165 | signal transduction                                            | 38 | 103  | 141 | 5985  | 2.0E-04 | 0.01     |
| BP       | GO:0071360 | cellular response to exogenous dsRNA                           | 0  | 4    | 4   | 18    | 2.8E-04 | 0.01     |

|    |            |                                                                               |    |     |     |       |          |      |
|----|------------|-------------------------------------------------------------------------------|----|-----|-----|-------|----------|------|
| BP | GO:0006954 | inflammatory response                                                         | 5  | 22  | 27  | 716   | 3.5E-04  | 0.01 |
| BP | GO:0007249 | I-kappaB kinase/NF-kappaB signaling                                           | 2  | 12  | 14  | 274   | 5.8E-04  | 0.01 |
| BP | GO:0050729 | positive regulation of inflammatory response                                  | 0  | 9   | 9   | 129   | 6.4E-04  | 0.01 |
| BP | GO:0002730 | regulation of dendritic cell cytokine production                              | 0  | 3   | 3   | 12    | 1.2E-03  | 0.02 |
| BP | GO:0035666 | TRIF-dependent toll-like receptor signaling pathway                           | 0  | 4   | 4   | 29    | 1.9E-03  | 0.03 |
| BP | GO:0043123 | positive regulation of I-kappaB kinase/NF-kappaB signaling                    | 1  | 9   | 10  | 184   | 2.2E-03  | 0.04 |
| BP | GO:0032757 | positive regulation of interleukin-8 production                               | 0  | 5   | 5   | 51    | 2.4E-03  | 0.04 |
| BP | GO:0032728 | positive regulation of interferon-beta production                             | 0  | 4   | 4   | 32    | 2.7E-03  | 0.04 |
| BP | GO:0002756 | MyD88-independent toll-like receptor signaling pathway                        | 0  | 4   | 4   | 33    | 3.0E-03  | 0.04 |
| BP | GO:0032722 | positive regulation of chemokine production                                   | 0  | 5   | 5   | 56    | 3.6E-03  | 0.05 |
| BP | GO:0043065 | positive regulation of apoptotic process                                      | 8  | 14  | 22  | 646   | 4.29E-03 | 0.06 |
| BP | GO:0032760 | positive regulation of tumor necrosis factor production                       | 1  | 5   | 6   | 85    | 4.81E-03 | 0.06 |
| BP | GO:0035458 | cellular response to interferon-beta                                          | 0  | 3   | 3   | 20    | 5.59E-03 | 0.07 |
| BP | GO:0034128 | negative regulation of MyD88-independent toll-like receptor signaling pathway | 0  | 2   | 2   | 7     | 6.67E-03 | 0.08 |
| BP | GO:0097190 | apoptotic signaling pathway                                                   | 5  | 15  | 20  | 597   | 7.54E-03 | 0.08 |
| MF | GO:0005515 | protein binding                                                               | 58 | 188 | 246 | 12646 | 0.01     | 0.10 |
| BP | GO:0045766 | positive regulation of angiogenesis                                           | 1  | 7   | 8   | 165   | 0.01     | 0.11 |



|    |            |                                                              |    |    |    |      |      |      |
|----|------------|--------------------------------------------------------------|----|----|----|------|------|------|
| BP | GO:0043330 | response to exogenous dsRNA                                  | 0  | 4  | 4  | 48   | 0.01 | 0.11 |
| BP | GO:1901224 | positive regulation of NIK/NF-kappaB signaling               | 1  | 4  | 5  | 76   | 0.01 | 0.12 |
| BP | GO:0034346 | positive regulation of type III interferon production        | 0  | 1  | 1  | 1    | 0.02 | 0.13 |
| BP | GO:0045080 | positive regulation of chemokine biosynthetic process        | 0  | 2  | 2  | 12   | 0.02 | 0.13 |
| CC | GO:0036020 | endolysosome membrane                                        | 1  | 1  | 2  | 14   | 0.03 | 0.16 |
| BP | GO:0070266 | necroptotic process                                          | 0  | 3  | 3  | 35   | 0.03 | 0.16 |
| BP | GO:0035690 | cellular response to drug                                    | 1  | 3  | 4  | 71   | 0.04 | 0.21 |
| BP | GO:0002224 | toll-like receptor signaling pathway                         | 0  | 6  | 6  | 145  | 0.05 | 0.23 |
| BP | GO:0010628 | positive regulation of gene expression                       | 12 | 34 | 46 | 1979 | 0.06 | 0.24 |
| BP | GO:0071260 | cellular response to mechanical stimulus                     | 0  | 4  | 4  | 80   | 0.06 | 0.24 |
| BP | GO:0034123 | positive regulation of toll-like receptor signaling pathway  | 0  | 2  | 2  | 23   | 0.07 | 0.25 |
| BP | GO:0045356 | positive regulation of interferon-alpha biosynthetic process | 0  | 1  | 1  | 4    | 0.07 | 0.25 |
| CC | GO:0005783 | endoplasmic reticulum                                        | 11 | 32 | 43 | 1924 | 0.08 | 0.28 |
| BP | GO:0045671 | negative regulation of osteoclast differentiation            | 1  | 1  | 2  | 27   | 0.09 | 0.28 |
| MF | GO:0042802 | identical protein binding                                    | 7  | 32 | 39 | 1757 | 0.10 | 0.30 |
| BP | GO:0097527 | necroptotic signaling pathway                                | 0  | 1  | 1  | 6    | 0.11 | 0.30 |
| BP | GO:0046330 | positive regulation of JNK cascade                           | 1  | 4  | 5  | 138  | 0.11 | 0.32 |
| CC | GO:0031012 | extracellular matrix                                         | 4  | 5  | 9  | 317  | 0.12 | 0.33 |
| BP | GO:0043331 | response to dsRNA                                            | 0  | 4  | 4  | 103  | 0.12 | 0.33 |

|    |            |                                                                      |    |     |     |      |      |      |
|----|------------|----------------------------------------------------------------------|----|-----|-----|------|------|------|
| BP | GO:0045359 | positive regulation of interferon-beta biosynthetic process          | 0  | 1   | 1   | 8    | 0.14 | 0.34 |
| BP | GO:0032735 | positive regulation of interleukin-12 production                     | 0  | 2   | 2   | 36   | 0.14 | 0.35 |
| BP | GO:0042742 | defense response to bacterium                                        | 1  | 6   | 7   | 261  | 0.21 | 0.42 |
| BP | GO:0045944 | positive regulation of transcription from RNA polymerase II promoter | 3  | 23  | 26  | 1193 | 0.21 | 0.42 |
| BP | GO:0045078 | positive regulation of interferon-gamma biosynthetic process         | 0  | 1   | 1   | 13   | 0.21 | 0.42 |
| CC | GO:0005789 | endoplasmic reticulum membrane                                       | 2  | 21  | 23  | 1072 | 0.22 | 0.43 |
| BP | GO:0097191 | extrinsic apoptotic signaling pathway                                | 0  | 6   | 6   | 223  | 0.23 | 0.44 |
| BP | GO:0007250 | activation of NF-kappaB-inducing kinase activity                     | 0  | 1   | 1   | 18   | 0.28 | 0.49 |
| BP | GO:0007252 | I-kappaB phosphorylation                                             | 0  | 1   | 1   | 18   | 0.28 | 0.49 |
| BP | GO:0034138 | toll-like receptor 3 signaling pathway                               | 0  | 1   | 1   | 20   | 0.31 | 0.51 |
| CC | GO:0005765 | lysosomal membrane                                                   | 2  | 6   | 8   | 360  | 0.32 | 0.52 |
| BP | GO:0006972 | hyperosmotic response                                                | 0  | 1   | 1   | 29   | 0.42 | 0.60 |
| CC | GO:0016020 | membrane                                                             | 42 | 129 | 171 | 9421 | 0.46 | 0.63 |
| BP | GO:0008584 | male gonad development                                               | 1  | 2   | 3   | 139  | 0.47 | 0.64 |
| CC | GO:0010008 | endosome membrane                                                    | 1  | 8   | 9   | 477  | 0.49 | 0.65 |
| BP | GO:0001774 | microglial cell activation                                           | 0  | 1   | 1   | 45   | 0.57 | 0.71 |
| CC | GO:0005769 | early endosome                                                       | 2  | 4   | 6   | 355  | 0.62 | 0.75 |
| MF | GO:0038023 | signaling receptor activity                                          | 11 | 14  | 25  | 1478 | 0.66 | 0.77 |
| CC | GO:0005768 | endosome                                                             | 4  | 11  | 15  | 922  | 0.69 | 0.80 |

|    |            |                                           |    |    |    |      |      |      |
|----|------------|-------------------------------------------|----|----|----|------|------|------|
| MF | GO:0004888 | transmembrane signaling receptor activity | 10 | 11 | 21 | 1276 | 0.70 | 0.80 |
| CC | GO:0005887 | integral component of plasma membrane     | 11 | 14 | 25 | 1667 | 0.86 | 0.92 |
| CC | GO:0016021 | integral component of membrane            | 23 | 66 | 89 | 5674 | 0.95 | 0.98 |
| CC | GO:0000139 | Golgi membrane                            | 1  | 7  | 8  | 746  | 0.96 | 0.98 |

Table S2. The complete list of TLR3-related genes in human VSMCs exposed to 12.5 µg/mL graphene oxide for 24 h. Data were expressed as mean±SD of triplicate.

| Gene name | Control      | GO           | Regulation | Log <sub>2</sub> (fc) | P value | Significant |
|-----------|--------------|--------------|------------|-----------------------|---------|-------------|
| IFIT1     | 58.68±8.22   | 1.69±0.39    | down       | -5.12                 | 0.00    | Yes         |
| MX1       | 14.92±1.47   | 0.50±0.15    | down       | -4.90                 | 0.00    | Yes         |
| OAS1      | 8.28±0.88    | 0.20±0.06    | down       | -5.41                 | 0.00    | Yes         |
| MX2       | 1.22±0.06    | 0.05±0.02    | down       | -4.75                 | 0.00    | Yes         |
| USP18     | 23.56±1.05   | 2.43±0.47    | down       | -3.28                 | 0.00    | Yes         |
| STAT1     | 81.05±10.91  | 17.76±0.83   | down       | -2.20                 | 0.00    | Yes         |
| RSAD2     | 5.51±1.22    | 0.45±0.04    | down       | -3.62                 | 0.00    | Yes         |
| ISG15     | 304.92±51.85 | 20.33±4.60   | down       | -3.91                 | 0.00    | Yes         |
| IRF7      | 17.40±1.13   | 4.77±0.16    | down       | -1.88                 | 0.00    | Yes         |
| IFI6      | 310.74±66.46 | 17.77±5.07   | down       | -4.14                 | 0.00    | Yes         |
| HERC5     | 1.87±0.34    | 0.31±0.06    | down       | -2.58                 | 0.00    | Yes         |
| CSF3      | 5.01±0.73    | 1.19±0.16    | down       | -2.09                 | 0.00    | Yes         |
| IFIT3     | 83.32±24.50  | 9.25±0.79    | down       | -3.17                 | 0.00    | Yes         |
| IL1B      | 10.13±0.40   | 3.73±0.91    | down       | -1.46                 | 0.00    | Yes         |
| DHX58     | 2.71±0.13    | 0.76±0.03    | down       | -1.84                 | 0.00    | Yes         |
| CXCL8     | 426.74±73.32 | 184.10±16.31 | down       | -1.21                 | 0.00    | Yes         |
| IFIT2     | 29.98±8.77   | 4.17±0.48    | down       | -2.85                 | 0.00    | Yes         |
| OASL      | 4.76±0.87    | 0.91±0.23    | down       | -2.39                 | 0.00    | Yes         |
| MMP1      | 883.65±35.93 | 416.48±43.34 | down       | -1.09                 | 0.00    | Yes         |
| MYD88     | 26.36±2.18   | 12.19±1.60   | down       | -1.12                 | 0.00    | Yes         |
| ID1       | 74.38±17.42  | 12.16±0.86   | down       | -2.63                 | 0.00    | Yes         |
| IFIH1     | 8.31±2.63    | 1.77±0.22    | down       | -2.23                 | 0.00    | Yes         |
| ZNFX1     | 27.27±2.88   | 14.68±0.37   | down       | -0.91                 | 0.00    | Yes         |
| CCL20     | 13.64±3.49   | 5.32±0.57    | down       | -1.35                 | 0.00    | Yes         |
| CXCL10    | 3.91±1.25    | 0.85±0.27    | down       | -2.21                 | 0.00    | Yes         |
| IFI44L    | 10.68±5.57   | 0.54±0.12    | down       | -4.31                 | 0.00    | Yes         |
| IFI44     | 27.56±12.58  | 2.94±0.26    | down       | -3.23                 | 0.00    | Yes         |
| EIF2AK2   | 22.24±6.37   | 8.81±1.25    | down       | -1.34                 | 0.00    | Yes         |
| TFPI2     | 59.86±5.40   | 36.83±2.78   | down       | -0.71                 | 0.00    | Yes         |

|          |             |            |      |       |      |     |
|----------|-------------|------------|------|-------|------|-----|
| DDX58    | 25.14±10.29 | 6.13±0.47  | down | -2.03 | 0.00 | Yes |
| NMI      | 6.33±1.57   | 3.41±0.23  | down | -0.89 | 0.00 | Yes |
| SOCS3    | 8.16±1.30   | 4.48±0.38  | down | -0.88 | 0.00 | Yes |
| ZC3HAV1  | 15.09±1.97  | 9.88±0.82  | down | -0.62 | 0.00 | Yes |
| IL1A     | 9.09±2.69   | 4.46±0.36  | down | -1.02 | 0.00 | Yes |
| TLR3     | 1.09±0.38   | 0.42±0.09  | down | 0.38  | 0.00 | Yes |
| VEGFC    | 25.72±1.75  | 17.14±1.14 | down | -0.60 | 0.00 | Yes |
| CXCL11   | 1.31±0.12   | 0.51±0.19  | down | -1.38 | 0.00 | Yes |
| CD274    | 4.88±1.05   | 3.12±0.16  | down | -0.64 | 0.00 | Yes |
| GLRX3    | 30.02±0.83  | 20.71±1.62 | down | -0.54 | 0.00 | Yes |
| DUSP1    | 83.16±5.10  | 59.02±5.96 | down | -0.50 | 0.01 | no  |
| PTGES    | 2.33±0.57   | 1.01±0.32  | down | -1.21 | 0.01 | no  |
| CXCL3    | 5.14±0.63   | 3.33±0.28  | down | -0.63 | 0.01 | no  |
| CXCL2    | 11.92±1.74  | 8.04±0.25  | down | -0.58 | 0.01 | no  |
| PROCR    | 7.76±0.92   | 5.17±0.49  | down | -0.60 | 0.01 | no  |
| IFI16    | 35.96±10.42 | 23.07±0.36 | down | -0.64 | 0.01 | no  |
| SERPINB9 | 1.23±0.03   | 0.74±0.16  | down | -0.76 | 0.01 | no  |
| CCL5     | 1.17±0.22   | 0.52±0.09  | down | -1.17 | 0.02 | no  |
| CCL5     | 1.17±0.22   | 0.52±0.09  | down | -1.17 | 0.02 | no  |
| LIPG     | 1.07±0.02   | 0.74±0.02  | down | -0.54 | 0.02 | no  |
| ABCA1    | 12.19±2.25  | 8.91±1.64  | down | -0.46 | 0.03 | no  |
| PECAM1   | 7.11±0.19   | 5.41±0.31  | down | -0.40 | 0.03 | no  |
| GBP3     | 15.41±5.07  | 10.35±0.81 | down | -0.57 | 0.05 | no  |
| CSF2     | 11.07±2.65  | 7.51±1.17  | down | -0.58 | 0.06 | no  |
| LIPA     | 29.30±0.60  | 23.59±0.68 | down | -0.32 | 0.07 | no  |
| CTH      | 1.13±0.06   | 1.67±0.18  | up   | 0.55  | 0.09 | no  |
| IL6      | 5.58±0.96   | 4.27±0.55  | down | -0.39 | 0.09 | no  |
| PFDN6    | 10.99±0.69  | 8.54±1.39  | down | -0.37 | 0.10 | no  |
| CPM      | 1.67±0.10   | 1.33±0.15  | down | -0.34 | 0.14 | no  |
| TNFRSF1B | 4.45±0.74   | 3.65±0.17  | down | -0.30 | 0.16 | no  |
| GCH1     | 1.64±0.15   | 1.23±0.12  | down | -0.42 | 0.17 | no  |
| PMAIP1   | 14.85±2.18  | 12.84±0.69 | down | -0.22 | 0.27 | no  |
| CALCOCO2 | 6.80±0.21   | 5.94±0.24  | down | -0.20 | 0.28 | no  |
| AKT3     | 4.23±1.07   | 4.88±0.54  | down | 0.20  | 0.30 | no  |
| CD40     | 1.40±0.09   | 1.11±0.03  | down | -0.34 | 0.31 | no  |
| BCAR3    | 9.45±0.65   | 8.38±0.12  | down | -0.19 | 0.32 | no  |
| SRC      | 7.22±1.08   | 8.20±0.20  | up   | 0.16  | 0.37 | no  |
| NFKBIZ   | 11.83±3.52  | 10.49±1.58 | down | -0.18 | 0.47 | no  |
| CFLAR    | 5.80±1.25   | 5.31±0.84  | down | -0.14 | 0.48 | no  |
| RIPK1    | 9.61±0.67   | 8.84±0.68  | down | -0.13 | 0.48 | no  |
| N4BP1    | 5.78±0.53   | 5.32±0.56  | down | -0.13 | 0.49 | no  |
| ATF3     | 1.18±0.19   | 1.37±0.11  | down | 0.19  | 0.49 | no  |
| LMNB1    | 11.36±0.65  | 10.50±0.69 | down | -0.13 | 0.51 | no  |

|        |              |              |      |       |      |    |
|--------|--------------|--------------|------|-------|------|----|
| FAS    | 4.02±0.97    | 4.45±0.42    | up   | 0.14  | 0.51 | no |
| ZNF644 | 3.87±1.37    | 4.43±0.67    | up   | 0.19  | 0.52 | no |
| ZBTB22 | 9.37±0.74    | 10.26±1.40   | up   | 0.12  | 0.59 | no |
| MAP3K7 | 9.29±2.63    | 10.00±0.73   | up   | 0.10  | 0.63 | no |
| TSLP   | 1.02±0.20    | 0.94±0.11    | down | -0.14 | 0.66 | no |
| TIMP1  | 226.78±35.09 | 209.96±32.91 | down | -0.12 | 0.66 | no |
| FURIN  | 85.46±16.32  | 81.09±1.89   | down | -0.10 | 0.67 | no |
| DNMT1  | 12.74±0.46   | 12.24±0.48   | down | -0.07 | 0.70 | no |
| NFE2L3 | 20.33±2.21   | 17.91±0.22   | down | 0.06  | 0.71 | no |
| LPIN2  | 7.76±0.46    | 8.15±0.37    | up   | 0.06  | 0.76 | no |
| WDR92  | 1.11±0.18    | 1.06±0.08    | down | -0.07 | 0.79 | no |
| PIK3R1 | 5.82±1.66    | 6.07±0.73    | up   | 0.06  | 0.83 | no |
| SOCS1  | 4.18±0.48    | 4.13±0.47    | down | -0.03 | 0.94 | no |
| RAE1   | 6.48±0.54    | 6.56±0.53    | up   | 0.01  | 0.94 | no |
| IRAK4  | 4.43±0.74    | 4.42±0.30    | down | -0.01 | 0.95 | no |
| PHLDA1 | 24.37±2.26   | 24.4±13.47   | up   | -0.01 | 0.95 | no |
| TRAF3  | 10.79±0.15   | 10.84±0.18   | up   | 0.00  | 0.98 | no |
| IRF1   | 2.08±0.43    | 2.10±0.16    | up   | 0.00  | 1.00 | no |
